# Supplementary material for: Simultaneous Inhibition of LSD1 and TGFβ Enables Eradication of Poorly Immunogenic Tumors with Anti–PD-1 Treatment
Source: Oxford University Press journal article supplement (doi:10.1158/2159-8290.cd-20-0017), 2021-03-09
Supplement: 21598290cd200017-sup-235084_2_supp_6958460_qpcnh8.xlsx [file 21598290cd200017-sup-235084_2_supp_6958460_qpcnh8.xlsx]

## Sheet: Sheet1
Tumor cell-derived factors with immune suppressive effects on T cells, and their expression in scramble and Lsd1 KO B16 tumor cells
Pathways	Molecules	CPM (triplicates) in scramble B16			CPM (triplicates) in Lsd1 KO B16			FC for CPM>2	FDR for FC>1.5	Known function on T cells (cited from PMID: 28606733)
IL-10	IL-10	no expression								Inhibits T cell proliferation and effector functions
TGF-β	TGF-β1	4.78657	5.25959	2.93818	15.811	11.8398	11.1855	2.99101	6.51e-11	Inhibits T cell activation, proliferation and effector functions, and prevents CD8+ T cell infiltration into tumors
	TGF-β2	10.0555	9.03871	9.99505	12.2176	15.9133	11.5631	1.36456
	TGF-β3	8.05183	8.45431	8.68337	13.9576	13.8195	13.5097	1.63905	1.19e-07
CXCL12	CXCL12	no expression								Prevents CD8+ T cell infiltration into tumors
Glucose restriction										Reduces T cell activation and proliferation, and impairs CD8+ T cell function
Glutamine restriction										Reduces T proliferation and effector functions
IDO	IDO1	no expression								Tryptophan deprivation prevents T cell proliferation
	IDO2	0.296842	0.46752	0.367272	1.21041	0.799473	0.552009
NOS	iNOS (NOS2)	0.0742104	0	0.0787012	0.0378254	0.0380702	0.116212			Suppreses effector function of T cells, survival and differentiation of memory T cells
Arginase	ARG1	0.0371052	0	0.0787012	0.0378254	0.11421	0.0871594			Suppreses effector function of T cells, survival and differentiation of memory T cells
	ARG2	0	0.15584	0.0524675	0.0378254	0.0761403	0
Lactic acid accumulation	LDHA	2232.25	2295.09	2085.77	2107.67	2077.91	1869.07	0.915553		Attenuates TCR pathway and suppress T cell activation and proliferation
	LDHB	161.742	147.152	170.519	98.2704	105.683	83.121	0.598804
Adenosine accumulation	CD39	0	0.11688	0.0524675	0.0378254	0.190351	0.116212			Inhibits T cell activation, proliferation and effector functions
	CD73	0.0742104	0	0.0262337	0	0.152281	0
Galectin-1/3/9	Galectin-1	372.388	482.48	346.889	417.63	327.974	357.237	0.917692		Impairment in TCR signaling, apoptosis of activated T cell, elimination of Th1 and Th17 cells
	Galectin-3	389.308	498.454	292.873	610.578	508.16	451.805	1.33025		Impairment in TCR pathway, inhibition of T cell activation via CTLA-4 trapping, T cell dysfunction via interaction with LAG-3
	Galectin-9	63.116	92.6078	63.3545	164.767	128.487	144.045	1.99609	4.56e-06	Induction of apoptosis, T cell dysfunciton via binding to TIM-3
Tenascin-C	TNC	0.408157	0	0.367272	0.340429	0.0380702	0.174319	0.712918		Inhibition of T cell migration and proper activation
Tumor cell-derived factors with immune suppressive effects on dendritic cells, and their expression in scramble and Lsd1 KO B16 tumor cells
Pathways	Molecules	CPM (triplicates) in scramble B16			CPM (triplicates) in Lsd1 KO B16			FC for CPM>2	FDR for FC>1.5	Known function on DC cells (cited from PMID: 28606733)
VEGF-A	VEGF-A	342.667	372.262	250.637	386.613	444.621	441.259	1.31787		Inhibition of DC differentiation and maturation
IL-6	IL-6	0.0742104	0	0.0524675	0	0	0.0290531			Inhibition of DC differentiation and maturation
M-CSF	M-CSF	21.2242	19.0125	19.3343	43.4614	40.3544	29.9828	1.9103	1.48e-10	Inhibition of DC differentiation and maturation
IL-10	IL-10	no expression								Alteration of DC differentiation and Inhibition of DC function
TGF-β	TGF-β1	4.78657	5.25959	2.93818	15.811	11.8398	11.1855	2.99101	6.51e-11	Down-regulation of DC costimulatory and presenting molecules. Inhibition of TNF-a and IL-12 production. Increase of PD-L1 expression
	TGF-β2	10.0555	9.03871	9.99505	12.2176	15.9133	11.5631	1.36456
	TGF-β3	8.05183	8.45431	8.68337	13.9576	13.8195	13.5097	1.63905	1.19e-07
TSLP	TSLP	0.0371052	0.0779199	0.131169	0.264778	0.152281	0.0581062			Induction of tolerogenic DC
Lactic acid accumulation	LDHA	2232.25	2295.09	2085.77	2107.67	2077.91	1869.07	0.915553		Inhibition of mono-DC differentiation and of DC maturation and function; induction of tolerogenic DC
	LDHB	161.742	147.152	170.519	98.2704	105.683	83.121	0.598804
Oxysterols	P450 enzymes	no expression or no change								Inhibition of CCR7-dependent DC migration
Adenosine accumulation	CD39	0	0.11688	0.0524675	0.0378254	0.190351	0.116212			Induction of tolerogenic DC differentiation
	CD73	0.0742104	0	0.0262337	0	0.152281	0
CPM, counts per million; FC, fold change; FDR, false discovery rate
