# Supplementary material for: Simultaneous Inhibition of LSD1 and TGFβ Enables Eradication of Poorly Immunogenic Tumors with Anti–PD-1 Treatment
Source: Oxford University Press journal article supplement (doi:10.1158/2159-8290.cd-20-0017), 2021-03-09
Supplement: 21598290cd200017-sup-235084_2_supp_6958461_qpcnk8.xlsx [file 21598290cd200017-sup-235084_2_supp_6958461_qpcnk8.xlsx]

## Sheet: Sheet1
Table S3. DNA oligo sequences
CRISPR gRNA sequences
Target genes	Sequences
mouse Rcor1	AGAGAAGCACGGGTACAACA
mouse Tgfb1	TGGCGAGCCTTAGTTTGGAC
mouse Tgfb2	CGGATAGTCTTCCGGGGGGC
mouse Tgfb3	GGTTGGGCACCCGCAAGACC
Real-time qPCR primer sequences
Taget genes	Primer labels	Sequences
mouse Tgfb1	m-Tgfb1-qPCR-F1	CTCCCGTGGCTTCTAGTGC
	m-Tgfb1-qPCR-R1	GCCTTAGTTTGGACAGGATCTG
mouse Tgfb2	m-Tgfb2-qPCR-F1	CTTCGACGTGACAGACGCT
	m-Tgfb2-qPCR-R1	GCAGGGGCAGTGTAAACTTATT
mouse Tgfb3	m-Tgfb3-qPCR-F1	CCTGGCCCTGCTGAACTTG
	m-Tgfb3-qPCR-R1	TTGATGTGGCCGAAGTCCAAC
mouse Serpine1	m-Serpine1-qPCR-F1	TTCAGCCCTTGCTTGCCTC
	m-Serpine1-qPCR-R1	ACACTTTTACTCCGAAGTCGGT
mouse Ifna1	m-IFNα1-qPCR-F	CGGTGCTGAGCTACTGGC
	m-IFNα1-qPCR-R	TTTGTACCAGGAGTGTCAAGG
mouse Ifnb	m-IFNβ-qPCR-F	GGTGGAATGAGACTATTGTTG
	m-IFNβ-qPCR-R	AGGACATCTCCCACGTC
mouse Il28	m-IL-28B-qPCR-F	AGCTGCAGGTCCAAGAGCG
	m-IL-28B-qPCR-R	GGTGGTCAGGGCTGAGTCATT
mouse Isg15	m-ISG15-qPCR-F1	GGTGTCCGTGACTAACTCCAT
	m-ISG15-qPCR-R1	TGGAAAGGGTAAGACCGTCCT
mouse Oasl	m-OASL-qPCR-F1	CAGGAGCTGTACGGCTTCC
	m-OASL-qPCR-R1	CCTACCTTGAGTACCTTGAGCAC
mouse Tlr3	m-TLR3-qPCR-F1	GTGAGATACAACGTAGCTGACTG
	m-TLR3-qPCR-R1	TCCTGCATCCAAGATAGCAAGT
mouse Mda5	m-MDA5-qPCR-F3	CTACGCACTTTCCCAGTGGAT
	m-MDA5-qPCR-R3	TGTTCAGTCTGAGTCATGGGC
mouse Ddx58	m-RIG-I-qPCR-F1	AAGAGCCAGAGTGTCAGAATCT
	m-RIG-I-qPCR-R1	AGCTCCAGTTGGTAATTTCTTGG
mouse Oas2	m-Oas2-qPCR-F1	CCGGGCCAGTGCACAAGTTAG
	m-Oas2-qPCR-R1	CGATGGCACCGAGGACACC
mouse Mx1	m-Mx1-qPCR-F1	GATCCGACTTCACTTCCAGATGG
	m-Mx1-qPCR-R1	CATCTCAGTGGTAGTCAACCC
mouse Ifit1	m-lfit1-qPCR-F1	TCTAAACAGGGCCTTGCAG
	m-lfit1-qPCR-R1	GCAGAGCCCTTTTTGATAATGT
mouse Ifit3	m-lfit3-qPCR-F1	TGAACTGCTCAGCCCACA
	m-lfit3-qPCR-R1	TCCCGGTTGACCTCACTC
mouse Gapdh	m-Gapdh-qPCR-F	TGACCTCAACTACATGGTCTACA
	m-Gapdh-qPCR-R	CTTCCCATTCTCGGCCTTG
ChIP-PCR primer sequences
Genes	Target regions (relative to TSS)	Sequences
mouse Tgfb1	-3.0k bp	TGATTGGTCCCATGGCCTTATAG
		GTCTTTGTCCTTGGGCCTAGTTA
	-2.2k bp	TTTCTGTCTTCACTGTGCTCTCA
		GCAGGTTCCATACAGAGGAAGAA
	-1.2k bp	TTTGAGCAAGAGGGTAATGTGGA
		ACCTCGCACAGTACTTTTACCTT
	-0.3k bp	GGTCCCCACTTCTAATACAGGAC
		GGTGGATTTGGGAGTTGTTGAAG
	+0.6k bp	GCTCCCCTATTTAAGAACACCCA
		CCAAGGTGTCTCAGTATACCACC
	+1.6k bp	AGAAAGGTAGAACCCAGCTCAAG
		TACCCATCCCCTAGGTTTTCTCT
	+2.8k bp	AATGTGACCTCTTCGTTGGAGAA
		GAGGGAAATGGGGTGACATAGAG
